# Supplementary material for: The effect of COVID-19 vaccine to the Omicron variant in children and adolescents: a systematic review and meta-analysis
Source: PubMed Central journal article supplement (PMC11041831; doi:10.3389/fpubh.2024.1338208), 2024-04-10
Supplement: Presentation_1.pdf [file Presentation_1.pdf]

## *Supplementary Material*

### **Appendix 1: Search strategy**

#### **1. PubMed 02/06/2023 Results:796**

(((((("SARS-CoV-2 variants" [Supplementary Concept]) OR (Omicron)) OR (SARS-CoV-2 BA.5 variant)) OR (COVID-19 Virus variant B.1.1.529)) OR (SARS-CoV-2 omicron variant)) AND ((((((("COVID-19 Vaccines"[Mesh]) OR (Vaccine)) OR (COVID 19 Vaccines)) OR (COVID 19 Virus Vaccine)) OR (Coronavirus Disease 2019 Vaccine)) OR (SARS2 Vaccines)) OR (SARS CoV 2 Vaccine))) AND (((("Pediatrics"[Mesh]) OR (pediatric)) OR (((("Child"[Mesh]) OR (Children)) OR (Child))))

#### **2. Web of Science 02/06/2023 Results:281**

#1 (((TS=(Omicron)) OR TS=(SARS-CoV-2 BA.5 variant)) OR TS=(COVID-19 Virus variant B.1.1.529)) OR TS=(SARS-CoV-2 omicron variant)

#2 ((((((TS=(COVID-19 Vaccines)) OR TS=(Vaccine)) OR TS=(COVID 19 Vaccines)) OR TS=(COVID 19 Virus Vaccine)) OR TS=(Coronavirus Disease 2019 Vaccine)) OR TS=(SARS2 Vaccines)) OR TS=(SARS COV 2 Vaccine)

#3 (((TS=(Child)) OR TS=(Children)) OR TS=(Pediatrics)) OR TS=(Pediatric)

#4 #1 AND #2 AND #3

#### **3. Embase 02/06/2023 Results:461**

#1 'child'/exp OR 'child' OR 'children'

#2 'pediatric'/exp OR 'pediatric'

#3 #1 OR #2

#4 'sars-cov-2 vaccine'/exp OR 'covid-19 vaccines'/exp OR 'vaccine'/exp OR 'covid 19 vaccines'/exp OR 'covid 19 virus vaccine'/exp OR 'Coronavirus disease 2019 vaccine'/exp OR 'sars2 vaccines' OR 'sars cov 2 vaccine'/exp

#5 'omicron' OR 'sars-cov-2 ba.5 variant' OR 'covid-19 virus variant b.1.1.529' OR 'sars-cov-2 omicron'/exp OR 'sars-cov-2 omicrion'

#6 #3 AND #4 AND #5

#### **4. Cochrane 02/06/2023 Results:193**

#1 MeSH descriptor: [Child] explode all trees

#2 Children

#3 #1 OR #2

#4 MeSH descriptor:[Pediatrics] explode all trees

#5 Pediatric

#6 #4 OR #5

#7 #3 OR #6

#8 MeSH descriptor:[COVID-19 Vaccines] explode all trees

#9 Vaccine OR 'COVID 19 Vaccines' OR 'COVID 10 Virus Vaccine' OR 'Coronavirus Disease 2019 Vaccine' OR 'SARS2 Vaccines' OR 'SARS CoV 2 Vaccine'

#10 #8 OR #9

#11 Omicron OR 'SARS-CoV-2 BA.5 variant' OR 'COVID-19 Virus variant B.1.1.529' OR 'SARS-CoV-2 omicron variant'

#12 #7 AND #10 AND #11

**Appendix 2: Supplementary Figures**
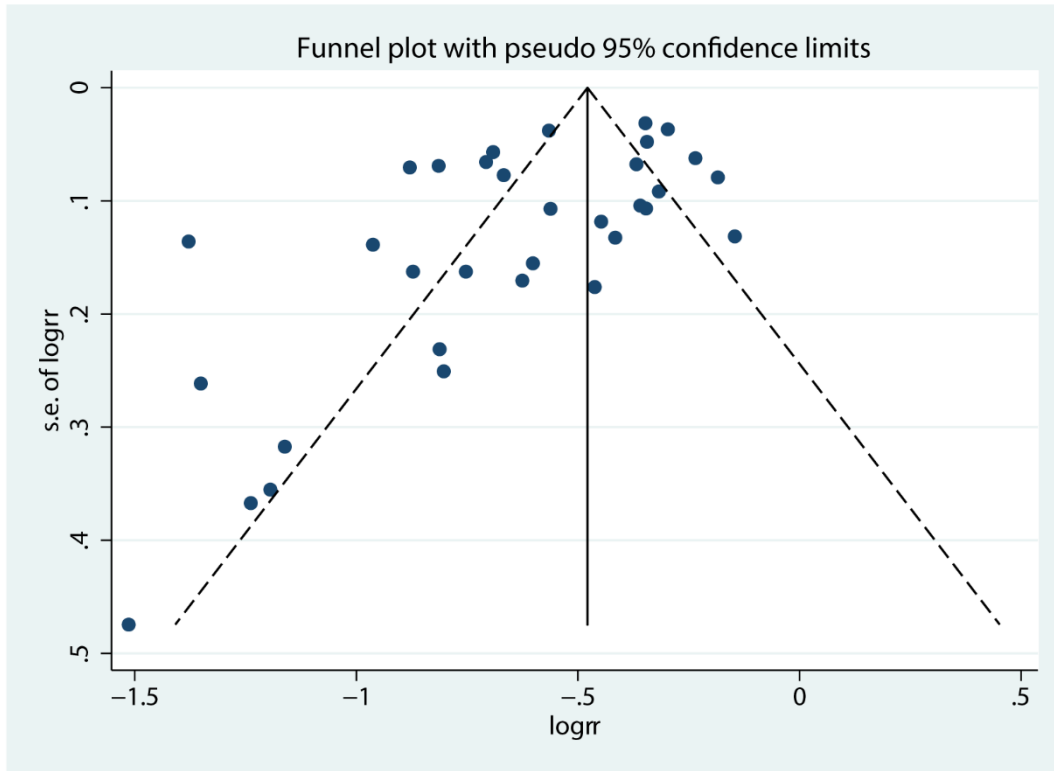

**Supplemental Figure 1.** Funnel plot of vaccine effectiveness studies. The funnel plots are centered at 0 (i.e., at the value under the null hypothesis of no effect) and display the studies' results (x-axis) and their precision (y-axis). In the meta-analyses, the result is expressed as log risk ratios (RRs) and the precision is represented by the standard error of the estimates. Each dot represents a single observation. The funnel plot shows an asymmetry indicating potential publication bias.

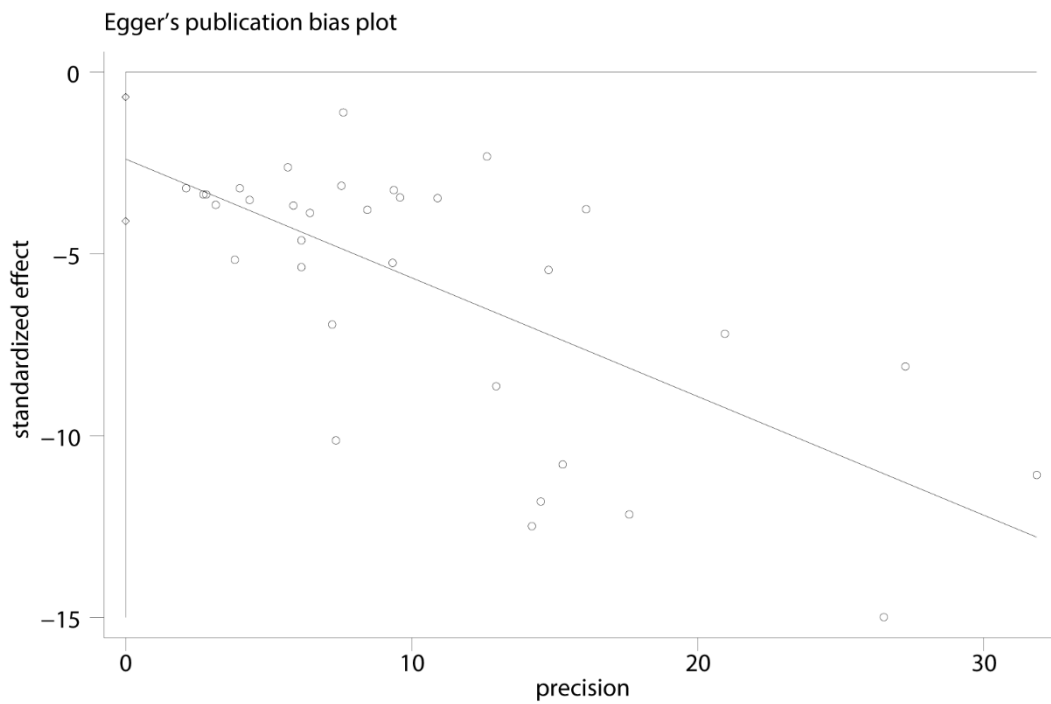

**Supplemental Figure 2.** Egger's publication bias plot of vaccine effectiveness studies. The X-axis represents the precision size, while the Y-axis depicts the standardized effect size. Each data point represents an individual study, with its position indicating the observed effect size and standard error. Studies deviating from the regression line suggesting potential publication bias (t value of Egger's test = -2.86,  $p=0.01$ ).

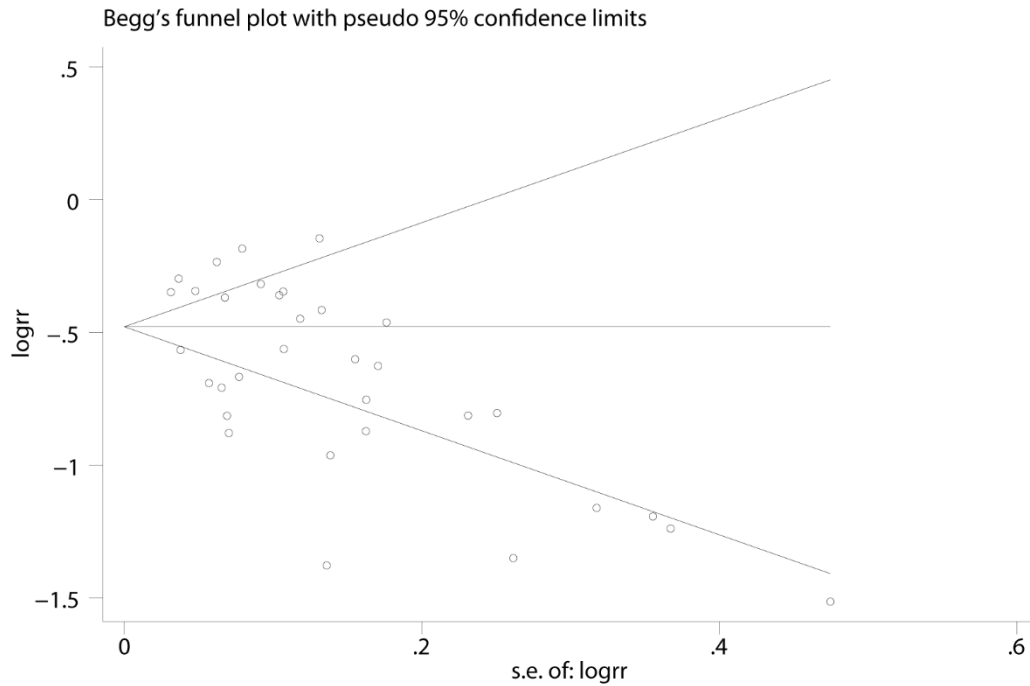

**Supplemental Figure 3.** Begg's funnel plot of vaccine effectiveness studies. The X-axis is expressed as log risk ratios (RRs) and the Y-axis depicts the standardized effect size. Each data point represents an individual study, with its position indicating the observed effect size and standard error. Smaller studies scattered widely at the bottom, and larger studies clustered closer to the top. Studies deviating from the regression line suggesting potential publication bias (z value of Begg's test =2.09, p=0.04).

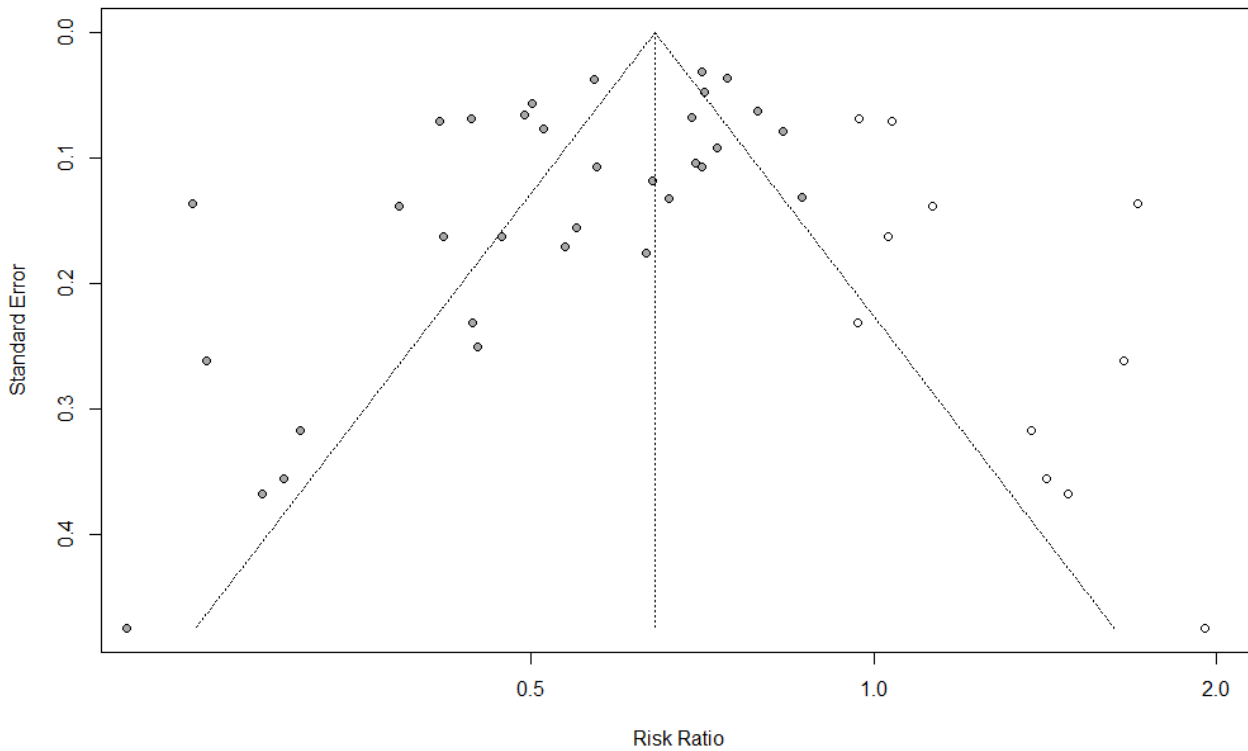

**Supplemental Figure 4.** Filled funnel plot of vaccine effectiveness studies. The filled funnel plot integrates black dots representing included studies and gray circles representing additional studies imputed through trim-and-fill analysis to address potential publication bias. The inclusion of 11 imputed studies in the trim-and-fill analysis suggests no significant publication bias after adjustment (t value of adjustment Egger’s test = -0.38,  $p=0.71$ ).

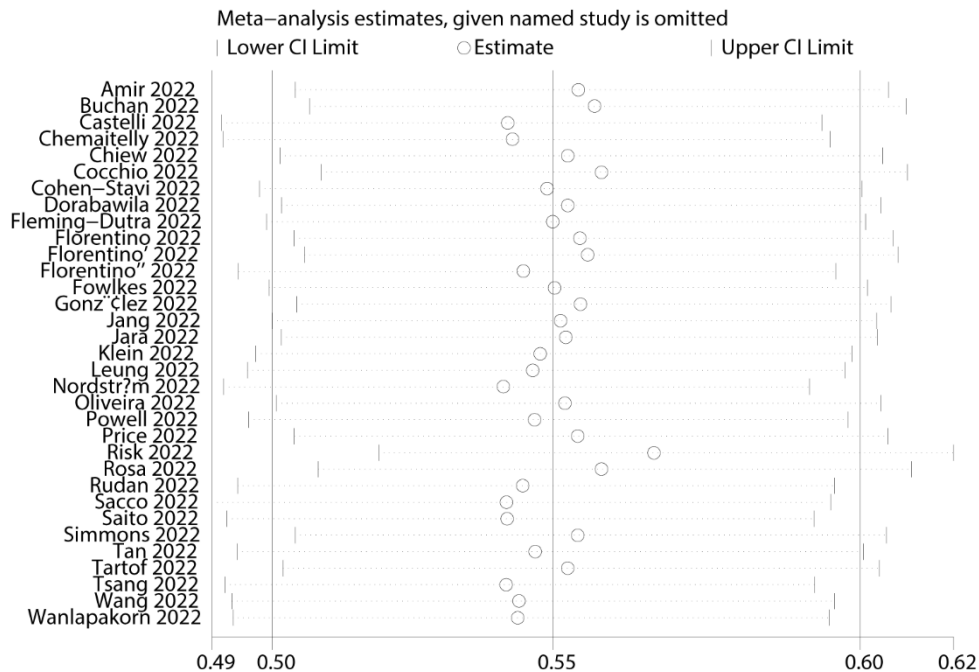

**Supplemental Figure 5.** The sensitive analysis of vaccine effectiveness studies. Each line or data point represents a different sensitivity analysis scenario, such as excluding certain studies or using different statistical models. When points cluster closer to the central reference line, it indicates greater robustness and consistency in the results across different scenarios, suggesting higher reliability. The results were robust through removing a single study each time.

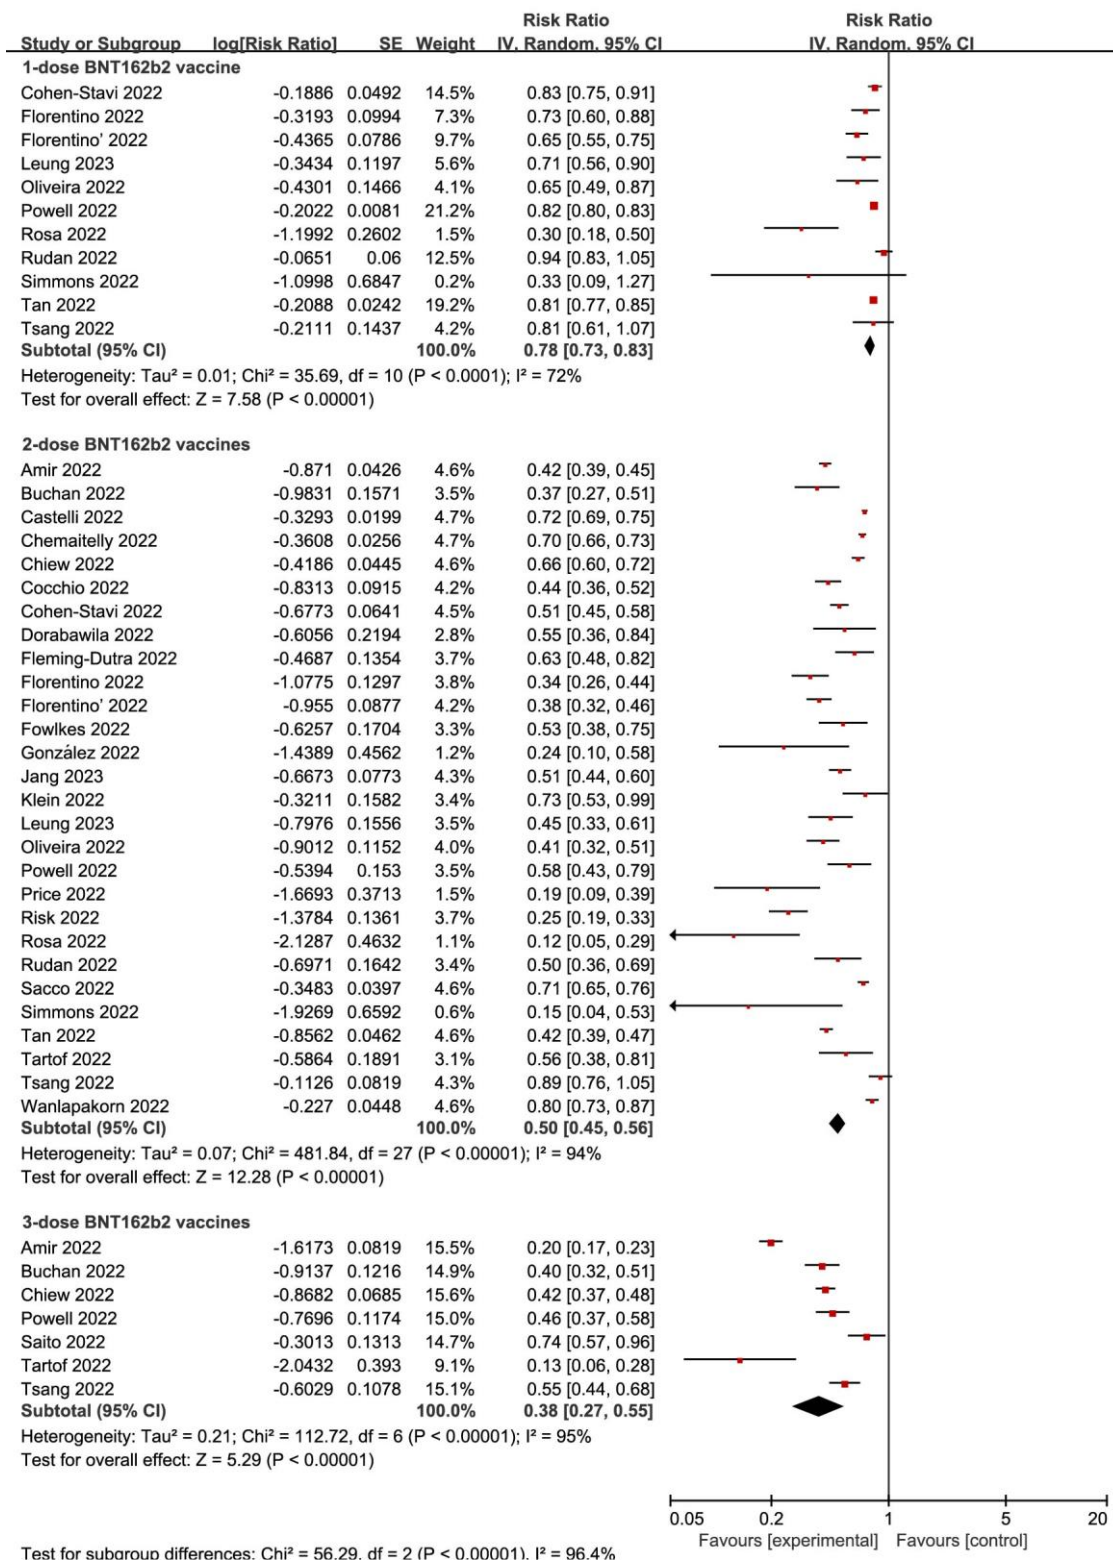

**Supplemental Figure 6.** Forest plot for vaccine effectiveness of different vaccines doses for the BNT162b2 vaccine on preventing Omicron infections. The red square symbolizes the point estimate for each study, with its size proportional to the study's weight relative to the summary estimate. The black diamond symbol represents the overall effect estimate derived from the meta-analysis. A random effects model was employed when I<sup>2</sup> exceeded 50%.



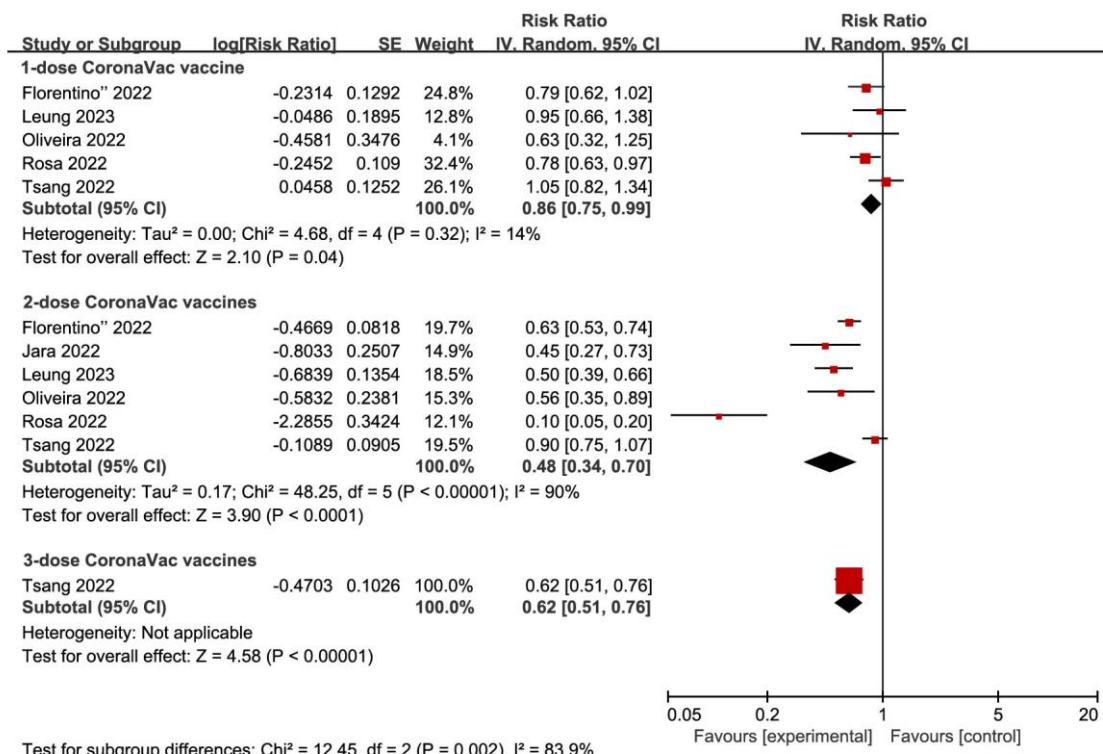

**Supplemental Figure 7.** Forest plot for vaccine effectiveness of different vaccines doses for the CoronaVac vaccine on preventing Omicron infections. The red square symbolizes the point estimate for each study, with its size proportional to the study's weight relative to the summary estimate. The black diamond symbol represents the overall effect estimate derived from the meta-analysis. A random effects model was employed when I<sup>2</sup> exceeded 50%.

**Appendix 3: Supplementary Table**
**Supplemental Table 1. Characteristics of included studies.**

| Name       | Country | Study design | Age        | Sample size (cases/total) | Vaccination type                                                                                                       | Time                     | Main outcome                                                                                                                                                                                                                                                                                                                                                |
|------------|---------|--------------|------------|---------------------------|------------------------------------------------------------------------------------------------------------------------|--------------------------|-------------------------------------------------------------------------------------------------------------------------------------------------------------------------------------------------------------------------------------------------------------------------------------------------------------------------------------------------------------|
| Amir 2022  | Israel  | Cohort study | 5-15 years | Not provided /1158289     | 2-dose BNT162b2 mRNA vaccine<br>3-dose BNT162b2 mRNA vaccine                                                           | 14-35 days<br>14-60 days | In 5-10 years, the 2-dose decreased confirmed infection rates by 2.3 times (2.0-2.5) lower.<br><br>In 12-15 years, the 3-dose decreased confirmed infection rates by 3.3 times (2.8-4.0).                                                                                                                                                                   |
| Tsang 2022 | China   | Cohort study | 5-17 years | 670/886                   | 1-dose BNT162b2 mRNA vaccine<br>1-dose CoronaVac vaccines<br>2-dose BNT162b2 mRNA vaccine<br>2-dose CoronaVac vaccines | <3 months<br>≥3 months   | COVID-19 Omicron infection for BNT162b2.<br>1-dose VE=28.6% (-33.9%-61.9%)<br>2-dose VE (≥3 months) =34.7% (-16.3%-63.3%)<br>2-dose VE (<3 months) = -15.1% (-292.2%-66.2%)<br><br>COVID-19 Omicron infection for CoronaVac.<br>1-dose VE=14.9% (-46.3%-50.5%)<br>2-dose VE (<3 months) =55.0% (-45.9%-86.1%)<br><br>COVID-19 Omicron symptomatic infection |

| Name       | Country | Study design       | Age         | Sample size (cases/total) | Vaccination type                                             | Time      | Main outcome                                                                                                                                                                                                                                                                                     |
|------------|---------|--------------------|-------------|---------------------------|--------------------------------------------------------------|-----------|--------------------------------------------------------------------------------------------------------------------------------------------------------------------------------------------------------------------------------------------------------------------------------------------------|
|            |         |                    |             |                           |                                                              |           | for BNT162b2.<br>1-dose VE=39.0% (-41.8%-73.8%)<br>2-dose VE ( $\geq 3$ months) =54.5% (-5.3%-80.3%)<br>2-dose VE (<3 months) =-21.2% (-438.2%-72.7%)<br>COVID-19 Omicron symptomatic infection for CoronaVac.<br>1-dose VE=8.0% (-79.0%-52.7%)<br>2-dose VE (<3 months) = 28.6% (-139.3%-78.7%) |
| Saito 2022 | Japan   | Case-control study | 13-18 years | 1128/1558                 | 3-dose BNT162b2 mRNA vaccine                                 | <2 months | COVID-19 Omicron infection for BNT162b2<br>3-dose VE= 86.4% (57.2%-95.7%)                                                                                                                                                                                                                        |
| Sacco 2022 | Italy   | Case-control study | 5-11 years  | 1197421 /2965918          | 1-dose BNT162b2 mRNA vaccine<br>2-dose BNT162b2 mRNA vaccine | <3 months | COVID-19 Omicron infection for BNT162b2 mRNA<br>1-dose VE= 27.4% (26.4%-28.4%)<br>2-dose VE= 29.4% (28.5%-30.2%)                                                                                                                                                                                 |

| Name       | Country  | Study design | Age         | Sample size (cases/total)                                            | Vaccination type             | Time                   | Main outcome                                                                                                                                                                                                                                                                                                                                                                                                                       |
|------------|----------|--------------|-------------|----------------------------------------------------------------------|------------------------------|------------------------|------------------------------------------------------------------------------------------------------------------------------------------------------------------------------------------------------------------------------------------------------------------------------------------------------------------------------------------------------------------------------------------------------------------------------------|
|            |          |              |             |                                                                      |                              |                        | COVID-19 Omicron severe infection for BNT162b2 mRNA<br>1-dose VE= 38.1% (20.9%-51.5%)<br>2-dose VE= 41.1% (22.2%-55.4%)                                                                                                                                                                                                                                                                                                            |
| Rudan 2022 | Scotland | Cohort study | 12-17 years | 12-15 years:<br>84300/23768<br>1<br>16-17 years:<br>27173/11260<br>9 | 2-dose BNT162b2 mRNA vaccine | <3 months<br>≥3 months | COVID-19 Omicron symptomatic infection for BNT162b2 in 12-15 years.<br>1-dose VE (0-1week) =14.2% (-10.3%-33.2%)<br>1-dose VE (2-5weeks) =30.2% (18.4%-40.3%)<br>1-dose VE (6-9week) =21.8% (11.5%-30.8%)<br>1-dose VE (10-13weeks) =16.9% (8.7%-24.4%)<br>1-dose VE (14-17week) =9.5% (-3.6%-20.9%)<br>1-dose VE (>18weeks) =5.4% (-13.4%-21.0%)<br>2-dose VE (0-1week) =46.9% (37%-55.3%)<br>2-dose VE (2-5weeks) =81.2% (77.7%- |

| Name | Country | Study design | Age | Sample size (cases/total) | Vaccination type | Time | Main outcome                                                                                                                                                                                                                                                                                                                                                                                                                                                                                                                                                         |
|------|---------|--------------|-----|---------------------------|------------------|------|----------------------------------------------------------------------------------------------------------------------------------------------------------------------------------------------------------------------------------------------------------------------------------------------------------------------------------------------------------------------------------------------------------------------------------------------------------------------------------------------------------------------------------------------------------------------|
|      |         |              |     |                           |                  |      | <p>84.2%)</p> <p>2-dose VE (6-9week) =68.5% (63.4%-72.9%)</p> <p>2-dose VE (10-13weeks) =43.3% (30.0%-54.2%)</p> <p>2-dose VE (&gt; 14week) =48.7% (22.0%-66.3%)</p> <p>COVID-19 Omicron symptomatic infection for BNT162b2 in 16-17 years.</p> <p>1-dose VE (0-1week) = -18.4% (-89.3%-26.0%)</p> <p>1-dose VE (2-5weeks) =22.8% (-6.4%-44.0%)</p> <p>1-dose VE (6-9week) =11.9% (-16.1%-33.1%)</p> <p>1-dose VE (10-13weeks) = -22.4% (-52.3%-1.6%)</p> <p>1-dose VE (14-17week) = -24.2% (-46.5% - -5.3%)</p> <p>1-dose (&gt; 18weeks) VE= -24.7% (-46.7% - -</p> |

| Name      | Country         | Study design       | Age        | Sample size (cases/total)                    | Vaccination type                                                                                                       | Time         | Main outcome                                                                                                                                                                                                                                                                                          |
|-----------|-----------------|--------------------|------------|----------------------------------------------|------------------------------------------------------------------------------------------------------------------------|--------------|-------------------------------------------------------------------------------------------------------------------------------------------------------------------------------------------------------------------------------------------------------------------------------------------------------|
|           |                 |                    |            |                                              |                                                                                                                        |              | 6.0%)<br>2-dose VE (0-1week) =34.0% (13.2%-49.9%)<br>2-dose VE (2-5weeks) =65.5% (56.0%-73.0%)<br>2-dose VE (6-9week) =43.4% (26.9%-56.2%)<br>2-dose VE (10-13weeks) =8.9% (-19.1%-30.3%)<br>2-dose VE (> 14week) =1.2% (-49.3%-34.6%)                                                                |
| Rosa 2022 | Hongkong, China | Case-control study | 3-18 years | 3-11 years: 143/1099<br>12-18 years: 306/455 | 1-dose BNT162b2 mRNA vaccine<br>1-dose CoronaVac vaccines<br>2-dose BNT162b2 mRNA vaccine<br>2-dose CoronaVac vaccines | Not provided | COVID-19 Omicron hospitalization for BNT162b2 in 3-11 years.<br>1-dose VE= 65.6% (38.2%-82.55)<br>COVID-19 Omicron hospitalization for CoronaVac in 3-11 years.<br>1-dose VE= 13.5% (-14.0%-34.6%)<br>2-dose VE= 86.2% (65.8%-95.9%)<br>COVID-19 Omicron hospitalization for BNT162b2 in 12-18 years. |

| Name      | Country  | Study design | Age         | Sample size (cases/total) | Vaccination type             | Time                    | Main outcome                                                                                                                                                                                                                                                                                                                                                                                                                                                                     |
|-----------|----------|--------------|-------------|---------------------------|------------------------------|-------------------------|----------------------------------------------------------------------------------------------------------------------------------------------------------------------------------------------------------------------------------------------------------------------------------------------------------------------------------------------------------------------------------------------------------------------------------------------------------------------------------|
|           |          |              |             |                           |                              |                         | 1-dose VE=60.2% (47.0%-70.2%)<br>2-dose VE=82.3% (76.9%-86.4%)<br>COVID-19 Omicron hospitalization for CoronaVac in 12-18 years.<br>1-dose VE= 31.0% (-9.34%-58.3%)<br>2-dose VE= 90.7% (79.2%-96.8%)<br>COVID-19 Omicron severe infection for BNT162b2 in 3-18 years.<br>1-dose VE= 84.6% (69.7%-93.2%)<br>2-dose VE= 93.1% (86.4%-97.0%)<br>COVID-19 Omicron severe infection for CoronaVac in 3-18 years.<br>1-dose VE= 33.7% (-4.6%-58.9%)<br>2-dose VE= 95.8% (80.7%-99.8%) |
| Risk 2022 | American | Cohort study | 12-17 years | 2099/4332                 | 2-dose BNT162b2 mRNA vaccine | <3 months<br>3-6 months | COVID-19 Omicron infection for 2-dose BNT162b2 mRNA.                                                                                                                                                                                                                                                                                                                                                                                                                             |

| <b>Name</b> | <b>Country</b> | <b>Study design</b> | <b>Age</b>  | <b>Sample size (cases/total)</b> | <b>Vaccination type</b>                         | <b>Time</b>               | <b>Main outcome</b>                                                                                                                                                                                                                                                                                                                                                                            |
|-------------|----------------|---------------------|-------------|----------------------------------|-------------------------------------------------|---------------------------|------------------------------------------------------------------------------------------------------------------------------------------------------------------------------------------------------------------------------------------------------------------------------------------------------------------------------------------------------------------------------------------------|
|             |                |                     |             |                                  |                                                 | >6 months                 | VE (0-3month) = 54.5% (17.8%-76.9%)<br>VE (3-6month) = -25.0% (-68.8%-8.1%)<br>VE (>6month) = 4.2% (-20.2%-23.6%)                                                                                                                                                                                                                                                                              |
| Price 2022  | American       | Case-control study  | 12-18 years | 918/2275                         | 2-dose BNT162b2 mRNA vaccine                    | 2-22 weeks<br>23-24 weeks | COVID-19 Omicron hospitalization for 2-dose BNT162b2 in 12-18 years.<br>VE (2-22weeks) =43% (-1%-68%)<br>VE (23-24weeks) =38% (-3%-62%)<br>VE (no time limit) =40% (9%-60%)<br>COVID-19 Omicron hospitalization for 2-dose BNT162b2 in 5-11 years.<br>VE (no time limit) =68% (42%-82%)<br>COVID-19 Omicron severe infection for BNT162b2 in 12-18 years.<br>VE (no time limit) =79% (51%-91%) |
| Powell 2022 | England        | Case-control study  | 12-17 years | 458122/<br>1161704               | 1-dose BNT162b2 mRNA vaccine<br>2-dose BNT162b2 | 0–1 week<br>2–14 weeks    | COVID-19 Omicron symptomatic infection for 1-dose BNT162b2.<br>VE (0-1week) = 15.2% (9.9%-20.1%)                                                                                                                                                                                                                                                                                               |



| Name | Country | Study design | Age | Sample size (cases/total) | Vaccination type                                 | Time                                            | Main outcome                                                                                                                                                                                                                                                                                                                                                                                                                                                                                                                                                                                                                                                                  |
|------|---------|--------------|-----|---------------------------|--------------------------------------------------|-------------------------------------------------|-------------------------------------------------------------------------------------------------------------------------------------------------------------------------------------------------------------------------------------------------------------------------------------------------------------------------------------------------------------------------------------------------------------------------------------------------------------------------------------------------------------------------------------------------------------------------------------------------------------------------------------------------------------------------------|
|      |         |              |     |                           | mRNA vaccine<br><br>3-dose BNT162b2 mRNA vaccine | 15–24 weeks<br><br>25–39 weeks<br><br>≥40 weeks | VE (2-14weeks) = 18.8% (17.2%-20.3%)<br><br>VE (15-24week) = 17.9% (14.9%-20.7%)<br><br>VE (25-39weeks) = 12.8% (-1.6%-25.1%)<br><br>VE (≥40 weeks) = 14.7% (-19.9%-55.4%)<br><br>COVID-19 Omicron symptomatic infection for 2-dose BNT162b2.<br><br>VE (0-1week) = 52.2% (50.4%-53.9%)<br><br>VE (2-14weeks) = 64.5% (63.6%-65.4%)<br><br>VE (15-24week) = 29.8% (24.9%-34.2%)<br><br>VE (25-39weeks) = 19.4% (11.7%-26.4%)<br><br>VE (≥40 weeks) = 25.7% (-4.2%-47.0%)<br><br>COVID-19 Omicron symptomatic infection for 3-dose BNT162b2.<br><br>VE (0-1week) = 55.1% (50.7%-59.1%)<br><br>VE (2-14weeks) = 62.9% (60.5%-65.1%)<br><br>VE (15-24week) = 33.6% (14.6%-48.3%) |

| Name                | Country  | Study design       | Age         | Sample size (cases/total) | Vaccination type                                                                                                                                 | Time                                                                       | Main outcome                                                                                                                                                                                                                                                                                                                                                                                                                    |
|---------------------|----------|--------------------|-------------|---------------------------|--------------------------------------------------------------------------------------------------------------------------------------------------|----------------------------------------------------------------------------|---------------------------------------------------------------------------------------------------------------------------------------------------------------------------------------------------------------------------------------------------------------------------------------------------------------------------------------------------------------------------------------------------------------------------------|
| Wanlapakorn<br>2022 | Thailand | Cohort study       | 5-11 years  | 85/166                    | 1-dose CoronaVac vaccine +1-dose BNT162b2 vaccine<br><br>2-dose BNT162b2 mRNA vaccine<br><br>2-dose BBIBP-CorV vaccine + 1-dose BNT162b2 vaccine | > 1 month                                                                  | Neutralizing activity against Omicron infection for 1-dose CoronaVac vaccine +1-dose BNT162b2 vaccine.<br><br>Median (IQR)% =50.8(45.2-66.4)<br><br>Neutralizing activity against Omicron infection for 2-dose BNT162b2 mRNA vaccine.<br><br>Median (IQR)%=79.8(72.5-87.0)<br><br>Neutralizing activity against Omicron infection for 2-dose BBIBP-CorV vaccine + 1-dose BNT162b2 vaccine.<br><br>Median (IQR)%=82.2(71.7-87.5) |
| Florentino<br>2022  | Scotland | Case-control study | 12-17 years | 26177/45771               | 1-dose BNT162b2 mRNA vaccine<br><br>2-dose BNT162b2 mRNA vaccine                                                                                 | 0-6 days<br>7-13 days<br>≥14 days<br>0-13 days<br>14-27 days<br>28-41 days | COVID-19 Omicron symptomatic infection for 1-dose BNT162b2.<br><br>VE (0-6 days) = 10.1% (-14.2%-29.1%)<br>VE (7-13 days) = 42.5% (29.4%-53.3%)<br>VE (≥14 days) =25.1% (21.3%-28.7%)<br><br>COVID-19 Omicron symptomatic infection for 2-dose BNT162b2.                                                                                                                                                                        |

| Name              | Country | Study design       | Age         | Sample size (cases/total) | Vaccination type                                             | Time                                                                       | Main outcome                                                                                                                                                                                                                                                                                                                      |
|-------------------|---------|--------------------|-------------|---------------------------|--------------------------------------------------------------|----------------------------------------------------------------------------|-----------------------------------------------------------------------------------------------------------------------------------------------------------------------------------------------------------------------------------------------------------------------------------------------------------------------------------|
|                   |         |                    |             |                           |                                                              | 42-55 days<br>56-69 days<br>70-83 days<br>84-97 days<br>≥98 days           | VE (0-13 days) = 61.0% (56.9%-64.8%)<br>VE (14-27 days) = 82.6% (80.6%-84.5%)<br>VE (28-41 days) = 77.4% (74.7%-79.8%)<br>VE (42-55 days) = 69.6% (66.3%-72.6%)<br>VE (56-69 days) = 65.4% (61.9%-68.7%)<br>VE (70-83 days) = 58.0% (52.9%-62.6%)<br>VE (84-97 days) = 45.3% (37.2%-52.4%)<br>VE (≥98 days) = 50.6% (42.7%-57.4%) |
| Florentino ' 2022 | Brazil  | Case-control study | 12-17 years | 150291/355066             | 1-dose BNT162b2 mRNA vaccine<br>2-dose BNT162b2 mRNA vaccine | 0-6 days<br>7-13 days<br>≥14 days<br>0-13 days<br>14-27 days<br>28-41 days | COVID-19 Omicron symptomatic infection for 1-dose BNT162b2.<br>VE (0-6 days) = 37.5% (28.5%-45.3%)<br>VE (7-13 days) = 19.7% (10.6%-27.9%)<br>VE (≥14 days) = 28.0% (26.3%-29.7%)<br>COVID-19 Omicron symptomatic infection for 2-dose BNT162b2.                                                                                  |

| Name | Country | Study design | Age | Sample size (cases/total) | Vaccination type | Time                                                             | Main outcome                                                                                                                                                                                                                                                                                                                                                                                                                                                                                                                                                                                                                                                 |
|------|---------|--------------|-----|---------------------------|------------------|------------------------------------------------------------------|--------------------------------------------------------------------------------------------------------------------------------------------------------------------------------------------------------------------------------------------------------------------------------------------------------------------------------------------------------------------------------------------------------------------------------------------------------------------------------------------------------------------------------------------------------------------------------------------------------------------------------------------------------------|
|      |         |              |     |                           |                  | 42-55 days<br>56-69 days<br>70-83 days<br>84-97 days<br>≥98 days | VE (0-13 days) = 58.7% (56.4%-61.0%)<br>VE (14-27 days) = 64.7% (63.0%-66.3%)<br>VE (28-41 days) = 53.0% (51.3%-54.7%)<br>VE (42-55 days) = 40.6% (38.8%-42.4%)<br>VE (56-69 days) = 32.0% (30.0%-33.9%)<br>VE (70-83 days) = 25.3% (22.9%-27.6%)<br>VE (84-97 days) = 17.0% (13.8%-20.0%)<br>VE (≥98 days) = 5.9% (2.2%-9.4%)<br>COVID-19 Omicron severe infection for 1-dose BNT162b2.<br>VE (0-6 days) = 20.6% (-152.2%-75.0%)<br>VE (7-13 days) = 62.4% (-22.2%-88.5%)<br>VE (≥14 days) = 56.3% (45.9%-64.6%)<br>COVID-19 Omicron severe infection for 1-dose BNT162b2.<br>VE (0-13 days) = 65.0% (37.2%-80.5%)<br>VE (14-27 days) = 75.6% (58.1%-85.8%) |

| Name                 | Country | Study design       | Age        | Sample size (cases/total) | Vaccination type                                         | Time                            | Main outcome                                                                                                                                                                                                                                                                                                                                                                                 |
|----------------------|---------|--------------------|------------|---------------------------|----------------------------------------------------------|---------------------------------|----------------------------------------------------------------------------------------------------------------------------------------------------------------------------------------------------------------------------------------------------------------------------------------------------------------------------------------------------------------------------------------------|
|                      |         |                    |            |                           |                                                          |                                 | VE (28-41 days) = 82.8% (72.1%-89.4%)<br>VE (42-55 days) = 84.2% (76.3%-89.5%)<br>VE (56-69 days) = 83.7% (76.0%-88.9%)<br>VE (70-83 days) = 82.0% (72.6%-88.2%)<br>VE (84-97 days) = 86.4% (75.2%-92.6%)<br>VE ( $\geq 98$ days) = 82.7% (68.8%-90.4%)                                                                                                                                      |
| Florentino<br>” 2022 | Brazil  | Case-control study | 6-11 years | 89595/197958              | 1-dose CoronaVac vaccine<br><br>2-dose CoronaVac vaccine | 0-13 days<br><br>$\geq 14$ days | COVID-19 Omicron symptomatic infection for 1-dose CoronaVac vaccine.<br>VE (0-13 days) = -9.0% (-13.1%--4.9%)<br>VE ( $\geq 14$ days) = 21.2% (18.6%-23.8%)<br>COVID-19 Omicron symptomatic infection for 2-dose CoronaVac vaccine.<br>VE (0-13 days) = 30.8% (24.2%-36.8%)<br>VE ( $\geq 14$ days) = 39.8% (33.7%-45.4%)<br>COVID-19 Omicron severe infection for 1-dose CoronaVac vaccine. |

| Name           | Country   | Study design | Age         | Sample size (cases/total) | Vaccination type                                             | Time                                                               | Main outcome                                                                                                                                                                                                                                                                         |
|----------------|-----------|--------------|-------------|---------------------------|--------------------------------------------------------------|--------------------------------------------------------------------|--------------------------------------------------------------------------------------------------------------------------------------------------------------------------------------------------------------------------------------------------------------------------------------|
|                |           |              |             |                           |                                                              |                                                                    | <p>VE (0-13 days) = 27.0% (-5.2%-51.1%)</p> <p>VE (<math>\geq</math>14 days) = 47.1% (26.6%-62.7%)</p> <p>COVID-19 Omicron severe infection for 2-dose CoronaVac vaccine.</p> <p>VE (0-13 days) = 82.4% (44.2%-97.1%)</p> <p>VE (<math>\geq</math>14 days) = 59.2% (11.3%-84.5%)</p> |
| Nordström 2022 | Sweden    | Cohort study | 11-19 years | 501945/659924             | 2-dose COVID-19 mRNA vaccine                                 | No time limit                                                      | <p>COVID-19 Omicron infection for 2-dose COVID-19 mRNA vaccine.</p> <p>VE= -2% (-4%—0%)</p> <p>COVID-19 hospitalisation for 2-dose COVID-19 mRNA vaccine.</p> <p>VE= 75% (54%-86%)</p>                                                                                               |
| Chiew 2022     | Singapore | Cohort study | 12-17 years | 245028/249763             | 2-dose BNT162b2 mRNA vaccine<br>3-dose BNT162b2 mRNA vaccine | 1-7 days<br>8-59 days<br>60-89 days<br>90-119 days<br>120-149 days | <p>COVID-19 Omicron infection for BNT162b2.</p> <p>2-dose VE (no time limit) = 25% (21%-29%)</p> <p>3-dose VE (no time limit) = 56% (53%-58%)</p> <p>COVID-19 Omicron hospitalization for BNT162b2.</p>                                                                              |

| Name | Country | Study design | Age | Sample size (cases/total) | Vaccination type | Time                                                                                                                       | Main outcome                                                                                                                                                                                                                                                                                                                                                                                                                                                                                                                                                        |
|------|---------|--------------|-----|---------------------------|------------------|----------------------------------------------------------------------------------------------------------------------------|---------------------------------------------------------------------------------------------------------------------------------------------------------------------------------------------------------------------------------------------------------------------------------------------------------------------------------------------------------------------------------------------------------------------------------------------------------------------------------------------------------------------------------------------------------------------|
|      |         |              |     |                           |                  | 150-179 days<br>180-209 days<br>210-239 days<br>≥240 days<br>1-7 days<br>8-14 days<br>14-29 days<br>30-59 days<br>≥60 days | 2-dose VE (no time limit) = 75% (56%-86%)<br>3-dose VE (no time limit) =94% (86%-97%)<br>COVID-19 Omicron infection for 2-dose BNT162b2.<br>VE (1-7 days) = 48% (33%-60%)<br>VE (8-59 days) = 38% (33%-43%)<br>VE (60-89 days) = 33% (27%-38%)<br>VE (90-119 days) = 26% (21%-31%)<br>VE (120-149 days) = 19% (14%-25%)<br>VE (150-179 days) = 16% (10%-22%)<br>VE (180-209 days) = 18% (14%-23%)<br>VE (210-239 days) = 21% (16%-25%)<br>VE (≥240 days) = 41% (35%-46%)<br>COVID-19 Omicron hospitalization for 2-dose BNT162b2.<br>VE (8-59 days) = 76% (27%-92%) |

| Name | Country | Study design | Age | Sample size (cases/total) | Vaccination type | Time | Main outcome                                                                                                                                                                                                                                                                                                                                                                                                                                                                                                                                                                                                                                                      |
|------|---------|--------------|-----|---------------------------|------------------|------|-------------------------------------------------------------------------------------------------------------------------------------------------------------------------------------------------------------------------------------------------------------------------------------------------------------------------------------------------------------------------------------------------------------------------------------------------------------------------------------------------------------------------------------------------------------------------------------------------------------------------------------------------------------------|
|      |         |              |     |                           |                  |      | <p>VE (60-89 days) = 90% (51%-98%)</p> <p>VE (90-119 days) = 65% (15%-86%)</p> <p>VE (120-149 days) = 70% (26%-89%)</p> <p>VE (150-179 days) = 60% (19%-80%)</p> <p>VE (180-209 days) = 83% (65%-91%)</p> <p>VE (210-239 days) = 78% (55%-90%)</p> <p>COVID-19 Omicron infection for 3-dose BNT162b2.</p> <p>VE (1-7 days) = 47% (43%-49%)</p> <p>VE (8-14 days) = 60% (57%-63%)</p> <p>VE (14-29 days) = 61% (58%-63%)</p> <p>VE (30-59 days) = 53% (49%-55%)</p> <p>VE (<math>\geq 60</math> days) = 41% (35%-45%)</p> <p>COVID-19 Omicron hospitalization for 3-dose BNT162b2.</p> <p>VE (1-7 days) = 87% (67%-95%)</p> <p>VE (8-14 days) = 97% (83%-100%)</p> |



| Name     | Country   | Study design | Age        | Sample size (cases/total) | Vaccination type                                             | Time                                                                                  | Main outcome                                                                                                                                                                                                                                                                                                                                                                                                                                                                      |
|----------|-----------|--------------|------------|---------------------------|--------------------------------------------------------------|---------------------------------------------------------------------------------------|-----------------------------------------------------------------------------------------------------------------------------------------------------------------------------------------------------------------------------------------------------------------------------------------------------------------------------------------------------------------------------------------------------------------------------------------------------------------------------------|
|          |           |              |            |                           |                                                              |                                                                                       | VE (14-29 days) = 98% (89%-100%)<br>VE (30-59 days) = 89% (65%-96%)<br>VE ( $\geq 60$ days) = 85% (15%-98%)                                                                                                                                                                                                                                                                                                                                                                       |
| Tan 2022 | Singapore | Cohort study | 5-11 years | 203893/255936             | 1-dose BNT162b2 mRNA vaccine<br>2-dose BNT162b2 mRNA vaccine | 1-6 days<br>7-14 days<br>15-29 days<br>$\geq 30$ days<br>30-59 days<br>$\geq 60$ days | COVID-19 Omicron infection for 1-dose BNT162b2 in 5-11 years.<br>VE (no time limit) = 13.6% (11.7%-15.5%)<br>VE (1-6 days) = 20.9% (16.6%-25.0%)<br>VE (7-14 days) = -1.3% (-5.1%-2.4%)<br>VE (15-29 days) = 2.0% (-1.0%-4.8%)<br>VE ( $\geq 30$ days) = 21.9% (18.1%-25.6%)<br>COVID-19 Omicron hospitalizations for 1-dose BNT162b2 in 5-11 years.<br>VE (no time limit) = 42.3% (24.9%-55.7%)<br>VE (1-6 days) = 34.5% (-18.5%-63.8%)<br>VE (7-14 days) = 34.5% (-18.5%-63.8%) |

| Name | Country | Study design | Age | Sample size (cases/total) | Vaccination type | Time | Main outcome                                                                                                                                                                                                                                                                                                                                                                                                                                                                                                                                                                                                                                                                                                                              |
|------|---------|--------------|-----|---------------------------|------------------|------|-------------------------------------------------------------------------------------------------------------------------------------------------------------------------------------------------------------------------------------------------------------------------------------------------------------------------------------------------------------------------------------------------------------------------------------------------------------------------------------------------------------------------------------------------------------------------------------------------------------------------------------------------------------------------------------------------------------------------------------------|
|      |         |              |     |                           |                  |      | <p>VE (15-29 days) = 44.2% (18.9%-61.6%)</p> <p>VE (<math>\geq 30</math> days) = 51.6% (7.1%-74.8%)</p> <p>COVID-19 Omicron infection for 2-dose BNT162b2 in 5-11 years.</p> <p>VE (no time limit) = 36.8% (35.3%-38.2%)</p> <p>VE (1-6 days) = 35.7% (33.0%-38.2%)</p> <p>VE (7-14 days) = 48.8% (46.9%-50.8%)</p> <p>VE (15-29 days) = 37.6% (35.7%-39.3%)</p> <p>VE (30-59 days) = 28.5% (26.3%-30.7%)</p> <p>VE (<math>\geq 60</math> days) = 28.5% (26.3%-30.7%)</p> <p>COVID-19 Omicron hospitalizations for 2-dose BNT162b2 in 5-11 years.</p> <p>VE (no time limit) = 82.7% (74.8%-88.2%)</p> <p>VE (1-6 days) = 64.7% (37.3%-80.2%)</p> <p>VE (7-14 days) = 87.8% (72.2%-94.7%)</p> <p>VE (15-29 days) = 84.5% (72.7%-91.2%)</p> |

| Name         | Country | Study design          | Age         | Sample size (cases/total) | Vaccination type                                                                                       | Time                                              | Main outcome                                                                                                                                                                                                                                                                        |
|--------------|---------|-----------------------|-------------|---------------------------|--------------------------------------------------------------------------------------------------------|---------------------------------------------------|-------------------------------------------------------------------------------------------------------------------------------------------------------------------------------------------------------------------------------------------------------------------------------------|
|              |         |                       |             |                           |                                                                                                        |                                                   | VE (30-59 days) = 80.4% (67.0%—88.4%)                                                                                                                                                                                                                                               |
| Tartof 2022  | America | Cohort study          | 12-17 years | 2016/3168                 | 2-dose BNT162b2 mRNA vaccine                                                                           | <2 month<br>2-3 months<br>4-5 months<br>≥6 months | COVID-19 Omicron infection for 2-dose BNT162b2.<br><br>VE (<2 month) = 73% (54%-84%)<br>VE (2-3 months) = 38% (14%-56%)<br>VE (4-5 months) = 45% (28%-57%)<br>VE (≥6 months) = 16% (-7%-34%)                                                                                        |
| Cocchio 2022 | Italian | Cross-sectional study | 5-17 years  | 225983/585546             | 2-dose BNT162b2 mRNA vaccine<br><br>2-dose mRNA-1273 vaccine<br><br>1-dose mRNA-1273 + 1-dose BNT162b2 | 0–6 d<br>7–13 d<br>14–34 d<br>35–69 d<br>> 70 d   | COVID-19 Omicron infection for 2-dose BNT162b2 in 5-11 years.<br><br>VE (no time limit) = 35% (34%–37%)<br>VE (0-6 days) = 72% (69%–74%)<br>VE (7-13 days) = 70% (67% - 72%)<br>VE (14-34 days) = 53% (51%–55%)<br>VE (35-69 days) = 22% (19%–24%)<br>VE (≥70 days) = 23% (20%–26%) |

| Name | Country | Study design | Age | Sample size (cases/total) | Vaccination type | Time | Main outcome                                                                                                                                                                                                                                                                                                                                                                                                                                                                                                                                                                                                                                                                                              |
|------|---------|--------------|-----|---------------------------|------------------|------|-----------------------------------------------------------------------------------------------------------------------------------------------------------------------------------------------------------------------------------------------------------------------------------------------------------------------------------------------------------------------------------------------------------------------------------------------------------------------------------------------------------------------------------------------------------------------------------------------------------------------------------------------------------------------------------------------------------|
|      |         |              |     |                           |                  |      | <p>COVID-19 Omicron infection for 2-dose BNT162b2 in 12-17 years.</p> <p>VE (no time limit) = 17% (15%–20%)</p> <p>VE (0-6 days) = 81% (76%–85%)</p> <p>VE (7-13 days) = 83% (79%–86%)</p> <p>VE (14-34 days) = 59% (55%–62%)</p> <p>VE (35-69 days) = 23% (19%–27%)</p> <p>VE (<math>\geq 70</math> days) = 8% (5%–11%)</p> <p>COVID-19 Omicron infection for 2-dose mRNA-1273 in 12-17 years.</p> <p>VE (no time limit) = 30% (26%–33%)</p> <p>VE (0-6 days) = 88% (81%–92%)</p> <p>VE (7-13 days) = 78% (69%–84%)</p> <p>VE (14-34 days) = 55% (49%–61%)</p> <p>VE (35-69 days) = 29% (23%–35%)</p> <p>VE (<math>\geq 70</math> days) = 20% (15%–24%)</p> <p>COVID-19 Omicron infection for 3-dose</p> |

| <b>Name</b> | <b>Country</b> | <b>Study design</b> | <b>Age</b> | <b>Sample size (cases/total)</b> | <b>Vaccination type</b>      | <b>Time</b> | <b>Main outcome</b>                                                                                                                                                                                                                                                                                                                                                                                                                                                                                                            |
|-------------|----------------|---------------------|------------|----------------------------------|------------------------------|-------------|--------------------------------------------------------------------------------------------------------------------------------------------------------------------------------------------------------------------------------------------------------------------------------------------------------------------------------------------------------------------------------------------------------------------------------------------------------------------------------------------------------------------------------|
|             |                |                     |            |                                  |                              |             | <p>BNT162b2 in 12-17 years.</p> <p>VE (no time limit) = 38% (36%–40%)</p> <p>VE (0-6 days) = 79% (77%–81%)</p> <p>VE (7-13 days) = 80% (78%–82%)</p> <p>VE (14-34 days) = 72% (70%–73%)</p> <p>VE (35-69 days) = 30% (27%–33%)</p> <p>COVID-19 Omicron infection for 1-dose mRNA-1273 + 1-dose BNT162b2 in 12-17 years.</p> <p>VE (no time limit) = 53% (50%–56%)</p> <p>VE (0-6 days) = 82% (77%–86%)</p> <p>VE (7-13 days) = 80% (75%–84%)</p> <p>VE (14-34 days) = 71% (66%–74%)</p> <p>VE (35-69 days) = 32% (26%–38%)</p> |
| Cohen-Stavi | Israel         | Cohort study        | 5-11 years | 94728/189456                     | 1-dose BNT162b2 mRNA vaccine | 7-21 days   | COVID-19 Omicron infection for BNT162b2 in 5-11 years.                                                                                                                                                                                                                                                                                                                                                                                                                                                                         |

| Name | Country | Study design | Age | Sample size (cases/total) | Vaccination type             | Time       | Main outcome                                                                                                                                                                                                                                                                                                                                                                                                                                                                                                                                                                                                                                                                                                                  |
|------|---------|--------------|-----|---------------------------|------------------------------|------------|-------------------------------------------------------------------------------------------------------------------------------------------------------------------------------------------------------------------------------------------------------------------------------------------------------------------------------------------------------------------------------------------------------------------------------------------------------------------------------------------------------------------------------------------------------------------------------------------------------------------------------------------------------------------------------------------------------------------------------|
| 2022 |         |              |     |                           | 2-dose BNT162b2 mRNA vaccine | 14-27 days | <p>1-dose VE (14-27 days) = 17% (7%-25%)</p> <p>2-dose VE (7-21 days) = 51% (39%-61%)</p> <p>COVID-19 Omicron symptomatic infection for BNT162b2 in 5-11 years.</p> <p>1-dose VE (14-27 days) = 18% (-2%-34%)</p> <p>2-dose VE (7-21 days) = 48% (29%-63%)</p> <p>COVID-19 Omicron infection for 2-dose BNT162b2 in 5-6 years.</p> <p>VE (7-21 days) = 68% (43%-84%)</p> <p>COVID-19 Omicron symptomatic infection for 2-dose BNT162b2 in 5-6 years.</p> <p>VE (7-21 days) = 69% (30%-91%)</p> <p>COVID-19 Omicron infection for 2-dose BNT162b2 in 7-9 years.</p> <p>VE (7-21 days) = 56% (41%-68%)</p> <p>COVID-19 Omicron symptomatic infection for 2-dose BNT162b2 in 7-9 years.</p> <p>VE (7-21 days) = 49% (6%-76%)</p> |

| Name               | Country | Study design       | Age        | Sample size (cases/total) | Vaccination type                                                        | Time                              | Main outcome                                                                                                                                                                                                                                                                                                                                                                                                                                                                          |
|--------------------|---------|--------------------|------------|---------------------------|-------------------------------------------------------------------------|-----------------------------------|---------------------------------------------------------------------------------------------------------------------------------------------------------------------------------------------------------------------------------------------------------------------------------------------------------------------------------------------------------------------------------------------------------------------------------------------------------------------------------------|
|                    |         |                    |            |                           |                                                                         |                                   | <p>COVID-19 Omicron infection for 2-dose BNT162b2 in 10-11 years.</p> <p>VE (7-21 days) = 38% (18%-53%)</p> <p>COVID-19 Omicron symptomatic infection for 2-dose BNT162b2 in 10-11 years.</p> <p>VE (7-21 days) = 36% (0%-61%)</p>                                                                                                                                                                                                                                                    |
| Fleming-Dutra 2022 | America | Case-control study | 5-15 years | 53272 /121952             | <p>2-dose BNT162b2 mRNA vaccine</p> <p>3-dose BNT162b2 mRNA vaccine</p> | <p>0-2 months</p> <p>≥month 3</p> | <p>COVID-19 Omicron symptomatic infection for 2-dose BNT162b2 in 5-11 years.</p> <p>VE (0-2 months) = 60.1% (54.7%-64.8%)</p> <p>VE (&gt;2 months) = 28.9% (24.5%-33.1%)</p> <p>COVID-19 Omicron symptomatic infection for 2-dose BNT162b2 in 12-15 years.</p> <p>VE (0-2 months) = 59.5% (44.3%-70.6%)</p> <p>VE (&gt;2 months) =16.6% (8.1%-24.3%)</p> <p>VE (≥3 months) = 9.6% (-0.1%-18.3%)</p> <p>COVID-19 Omicron symptomatic infection for 3-dose BNT162b2 in 12-15 years.</p> |

| Name            | Country | Study design | Age        | Sample size (cases/total) | Vaccination type             | Time                         | Main outcome                                                                                                                                                                                                                                                                                                                                                                                                                                                                                                                                                                                                                              |
|-----------------|---------|--------------|------------|---------------------------|------------------------------|------------------------------|-------------------------------------------------------------------------------------------------------------------------------------------------------------------------------------------------------------------------------------------------------------------------------------------------------------------------------------------------------------------------------------------------------------------------------------------------------------------------------------------------------------------------------------------------------------------------------------------------------------------------------------------|
|                 |         |              |            |                           |                              |                              | VE (2-6.5 weeks) = 71.1% (65.5%-75.7%)                                                                                                                                                                                                                                                                                                                                                                                                                                                                                                                                                                                                    |
| Dorabawila 2022 | America | Cohort study | 5-17 years | 1217886/2423585           | 2-dose BNT162b2 mRNA vaccine | $\leq 13$ days<br>28-34 days | COVID-19 Omicron infection for 2-dose BNT162b2 in 5-11 years.<br>VE (no time limit) = 12% (6%-16%)<br>COVID-19 Omicron infection for 2-dose BNT162b2 in 12-17 years.<br>VE (no time limit) = 51% (48%-54%)<br>COVID-19 Omicron hospitalizations for 2-dose BNT162b2 in 5-11 years.<br>VE (no time limit) = 48% (-12%-75%)<br>COVID-19 Omicron hospitalizations for 2-dose BNT162b2 in 12-17 years.<br>VE (no time limit) = 73% (53%-87%)<br>COVID-19 Omicron symptomatic infection for 2-dose BNT162b2 in 5-11 years.<br>VE ( $\leq 13$ days) = 65% (62%-68%)<br>VE (28-34 days) = 12% (8%-16%)<br>COVID-19 Omicron symptomatic infection |



| Name        | Country | Study design       | Age         | Sample size (cases/total) | Vaccination type                                                 | Time                                                                    | Main outcome                                                                                                                                                                                                                                                                                                                                                                                                                                                |
|-------------|---------|--------------------|-------------|---------------------------|------------------------------------------------------------------|-------------------------------------------------------------------------|-------------------------------------------------------------------------------------------------------------------------------------------------------------------------------------------------------------------------------------------------------------------------------------------------------------------------------------------------------------------------------------------------------------------------------------------------------------|
|             |         |                    |             |                           |                                                                  |                                                                         | for 2-dose BNT162b2 in 12-17 years.<br>VE ( $\leq 13$ days) = 76% (71%-81%)<br>VE (28-34 days) = 56% (48%-63%)                                                                                                                                                                                                                                                                                                                                              |
| Buchan 2022 | Canada  | Case-control study | 12-17 years | 27556/29855               | 2-dose BNT162b2 mRNA vaccine<br><br>3-dose BNT162b2 mRNA vaccine | 1-6 days<br>7-59 days<br>60-119 days<br>120-179 days<br>$\geq 180$ days | COVID-19 Omicron symptomatic infection for 2-dose BNT162b2.<br>VE (7-59 days) = 51% (38%-61%)<br>VE (60-119 days) = 31% (20%-41%)<br>VE (120-179 days) = 29% (19%-38%)<br>VE ( $\geq 180$ days) = 29% (17%-38%)<br><br>COVID-19 Omicron symptomatic infection for 3-dose BNT162b2.<br>VE (1-6 days) = 56% (34%-70%)<br>VE ( $\geq 7$ days) = 62% (49%-72%)<br><br>COVID-19 Omicron severe infection for 2-dose BNT162b2.<br>VE (7-59 days) = 76% (-10%-95%) |

| Name         | Country | Study design       | Age         | Sample size (cases/total) | Vaccination type                                             | Time                                                                                                  | Main outcome                                                                                                                                                                                                                                           |
|--------------|---------|--------------------|-------------|---------------------------|--------------------------------------------------------------|-------------------------------------------------------------------------------------------------------|--------------------------------------------------------------------------------------------------------------------------------------------------------------------------------------------------------------------------------------------------------|
|              |         |                    |             |                           |                                                              |                                                                                                       | <p>VE (60-119 days) = 83% (55%-93%)</p> <p>VE (120-179 days) = 82% (64%-91%)</p> <p>VE (<math>\geq</math>180 days) =88% (77%-94%)</p> <p>COVID-19 Omicron severe infection for 3-dose BNT162b2.</p> <p>VE (<math>\geq</math>7 days) =85% (74%-91%)</p> |
| Simmons 2022 | Canada  | Case-control study | 12-17 years | Not provided /673         | 1-dose BNT162b2 mRNA vaccine<br>2-dose BNT162b2 mRNA vaccine | No time limit                                                                                         | <p>COVID-19 Omicron hospitalizations for 2-dose BNT162b2.</p> <p>OR=0.67 (0.08-6.80)</p> <p>COVID-19 Omicron hospitalizations for 3-dose BNT162b2.</p> <p>OR= 0.20 (0.08-0.59)</p>                                                                     |
| Fowlkes 2022 | America | Cohort study       | 5-15 years  | 978/1364                  | 2-dose BNT162b2 mRNA vaccine                                 | <p>14-82 days</p> <p><math>\geq</math>14 days</p> <p>14-149 days</p> <p><math>\geq</math>150 days</p> | <p>COVID-19 Omicron symptomatic infection for 2-dose BNT162b2 in 5-11 years.</p> <p>VE (14-82 days) = 31.0% (9.0%-48.0%)</p> <p>COVID-19 Omicron symptomatic infection for 2-dose BNT162b2 in 12-15 years.</p>                                         |

| Name       | Country | Study design       | Age        | Sample size (cases/total) | Vaccination type                                             | Time                                         | Main outcome                                                                                                                                                                                                                                                                                                                                                                                                                                                                                |
|------------|---------|--------------------|------------|---------------------------|--------------------------------------------------------------|----------------------------------------------|---------------------------------------------------------------------------------------------------------------------------------------------------------------------------------------------------------------------------------------------------------------------------------------------------------------------------------------------------------------------------------------------------------------------------------------------------------------------------------------------|
|            |         |                    |            |                           |                                                              |                                              | VE ( $\geq 14$ days) = 59.0% (24.0%-78.0%)<br>VE (14-149 days) = 59.0% (22.0%-79.0%)<br>VE ( $\geq 150$ days) = 62.0% (-28.0%-89.0%)                                                                                                                                                                                                                                                                                                                                                        |
| Klein 2022 | America | Case-control study | 5-17 years | 2577/12214                | 2-dose BNT162b2 mRNA vaccine<br>3-dose BNT162b2 mRNA vaccine | 14-67 days<br>14-149 days<br>$\geq 150$ days | COVID-19 Omicron infection for 2-dose BNT162b2 in 5-11 years.<br>VE (14-67 days) = 51.0% (30.0%-65%)<br>COVID-19 Omicron infection for 2-dose BNT162b2 in 12-15 years.<br>VE (14-149 days) = 45.0% (30.0%-57%)<br>VE ( $\geq 150$ days) = -2.0% (-25.0%-17.0%)<br>COVID-19 Omicron infection for 2-dose BNT162b2 in 16-17 years.<br>VE (14-149 days) = 34.0% (8.0%-53.0%)<br>VE ( $\geq 150$ days) = -3.0% (-30.0%-18.0%)<br>COVID-19 Omicron infection for 3-dose BNT162b2 in 16-17 years. |

| Name          | Country   | Study design       | Age        | Sample size (cases/total) | Vaccination type                                                                                                                                                                  | Time                                                     | Main outcome                                                                                                                                                                                                                                                                                                                                                                                                                                                                                                                                                                                                                                                      |
|---------------|-----------|--------------------|------------|---------------------------|-----------------------------------------------------------------------------------------------------------------------------------------------------------------------------------|----------------------------------------------------------|-------------------------------------------------------------------------------------------------------------------------------------------------------------------------------------------------------------------------------------------------------------------------------------------------------------------------------------------------------------------------------------------------------------------------------------------------------------------------------------------------------------------------------------------------------------------------------------------------------------------------------------------------------------------|
|               |           |                    |            |                           |                                                                                                                                                                                   |                                                          | VE ( $\geq 7$ days) = 81.0% (59.0%-91.0%)                                                                                                                                                                                                                                                                                                                                                                                                                                                                                                                                                                                                                         |
| Castelli 2022 | Argentina | Case-control study | 3-17 years | 188907/249112             | 2-dose BNT162b2 mRNA vaccine<br>2-dose BBIBP-CorV vaccine<br>2-dose mRNA-1273 vaccine<br>1-dose mRNA-1273+ 1-dose BNT162b2<br>1-dose BNT162b2/mRNA-1273+1-dose BNT162b2/mRNA-1273 | 15-30 days<br>31-45 days<br>45-60 days<br>$\geq 60$ days | COVID-19 Omicron infection for 2-dose vaccination in 3-17 years.<br>VE (no time limit) = 19.9% (18.0%-21.8%)<br>COVID-19 Omicron infection for 2-dose BBIBP-CorV vaccine in 3-11 years.<br>VE (no time limit) = 15.9% (13.2%-18.6%)<br>VE (15-30 days) = 37.6% (34.2%-40.8%)<br>VE (31-45 days) = 29.4% (26.2%-32.4%)<br>VE (45-60 days) = 17.6% (14.1%-20.9%)<br>VE ( $\geq 60$ days) = 2.0% (-1.8%-5.6%)<br>COVID-19 Omicron infection for 2-dose mRNA-1273 vaccine in 12-17 years.<br>VE (no time limit) = 17.9% (14.0%-21.5%)<br>COVID-19 Omicron infection for 1-dose mRNA-1273+ 1-dose BNT162b2 in 12-17 years.<br>VE (no time limit) = 31.5% (26.3%-36.4%) |

| Name | Country | Study design | Age        | Sample size (cases/total) | Vaccination type   | Time          | Main outcome                                                                                                                                                                                                                                                                                                                                                                                                                                                                                                                                                                                                                                                                                     |
|------|---------|--------------|------------|---------------------------|--------------------|---------------|--------------------------------------------------------------------------------------------------------------------------------------------------------------------------------------------------------------------------------------------------------------------------------------------------------------------------------------------------------------------------------------------------------------------------------------------------------------------------------------------------------------------------------------------------------------------------------------------------------------------------------------------------------------------------------------------------|
|      |         |              |            |                           |                    |               | <p>COVID-19 Omicron infection for 1-dose BNT162b2+ 1-dose mRNA-1273 in 12-17 years.</p> <p>VE (no time limit) = 40.6% (29.4%-50.0%)</p> <p>COVID-19 Omicron infection for 2-dose BNT162b2 in 12-17 years.</p> <p>VE (no time limit) = 28.1% (25.2%-30.8%)</p> <p>COVID-19 Omicron severe infection for 2-dose vaccination in 3-17 years.</p> <p>VE (no time limit) = 88.1% (70.7%-95.2%)</p> <p>COVID-19 Omicron severe infection for 2-dose BBIBP-CorV vaccine in 3-11 years.</p> <p>VE (no time limit) =66.9% (6.4%-89.8%)</p> <p>COVID-19 Omicron severe infection for 1-dose BNT162b2/mRNA-1273+1-dose BNT162b2/mRNA-1273 in 12-17 years.</p> <p>VE (no time limit) =97.6% (81.0%-99.7%)</p> |
| Wang | China   | Case-control | 0-17 years | 126/376                   | 1-dose vaccination | No time limit | COVID-19 Omicron symptomatic infection                                                                                                                                                                                                                                                                                                                                                                                                                                                                                                                                                                                                                                                           |

| Name       | Country         | Study design       | Age        | Sample size (cases/total) | Vaccination type                                                                                                                        | Time         | Main outcome                                                                                                                                                                                                                                                                                                                                                                                                             |
|------------|-----------------|--------------------|------------|---------------------------|-----------------------------------------------------------------------------------------------------------------------------------------|--------------|--------------------------------------------------------------------------------------------------------------------------------------------------------------------------------------------------------------------------------------------------------------------------------------------------------------------------------------------------------------------------------------------------------------------------|
| 2022       |                 | study              |            |                           | 2-dose vaccination                                                                                                                      |              | <p>for 1-dose vaccination in 0-17 years.</p> <p>RR= 0.73 (0.47–1.13)</p> <p>COVID-19 Omicron symptomatic infection for 2-dose vaccination in 0-17 years.</p> <p>RR= 0.65 (0.53–0.79)</p> <p>COVID-19 Omicron symptomatic infection for 1-dose vaccination in 3-17 years.</p> <p>RR= 0.71 (0.57–0.88)</p> <p>COVID-19 Omicron symptomatic infection for 2-dose vaccination in 0-17 years.</p> <p>RR= 0.80 (0.51–1.24)</p> |
| Leung 2023 | Hongkong, China | Case-control study | 3-18 years | 757433/953400             | <p>1-dose CoronaVac vaccine</p> <p>1-dose BNT162b2 mRNA vaccine</p> <p>2-dose CoronaVac vaccine</p> <p>2-dose BNT162b2 mRNA vaccine</p> | Not provided | <p>COVID-19 Omicron symptomatic infection for 1-dose CoronaVac vaccine in 3-11 years.</p> <p>VE= -14.7% (-54.7%-14.6%)</p> <p>COVID-19 Omicron symptomatic infection for 1-dose BNT162b2 mRNA in 3-11 years.</p> <p>VE= 33.0% (3.0%-53.3%)</p> <p>COVID-19 Omicron symptomatic infection</p>                                                                                                                             |

| Name             | Country | Study design | Age        | Sample size (cases/total) | Vaccination type             | Time                    | Main outcome                                                                                                                                                                                                                                                                                                                                                                                                                                                                                                                                                       |
|------------------|---------|--------------|------------|---------------------------|------------------------------|-------------------------|--------------------------------------------------------------------------------------------------------------------------------------------------------------------------------------------------------------------------------------------------------------------------------------------------------------------------------------------------------------------------------------------------------------------------------------------------------------------------------------------------------------------------------------------------------------------|
|                  |         |              |            |                           |                              |                         | <p>for 2-dose CoronaVac vaccine in 3-11 years.<br/>VE= 40.8% (12.8%-59.5%)</p> <p>COVID-19 Omicron symptomatic infection for 1-dose CoronaVac vaccine in 12-18 years.<br/>VE= 21.5% (-7.7%-42.7%)</p> <p>COVID-19 Omicron symptomatic infection for 1-dose BNT162b2 mRNA in 12-18 years.<br/>VE= 26.1% (-0.3%-45.6%)</p> <p>COVID-19 Omicron symptomatic infection for 2-dose CoronaVac vaccine in 12-18 years.<br/>VE= 55.0% (38.2%-67.2%)</p> <p>COVID-19 Omicron symptomatic infection for 2-dose BNT162b2 mRNA in 12-18 years.<br/>VE= 54.9% (38.9%-66.8%)</p> |
| Chemaitelly 2022 | Qatar   | Cohort study | 5-17 years | 21888/113758              | 2-dose BNT162b2 mRNA vaccine | 0-30 days<br>31-60 days | <p>COVID-19 Omicron infection for 2-dose BNT162b2 mRNA in 5-11 years.<br/>VE (no time limit) = 25.7% (10.0%-38.6%)</p>                                                                                                                                                                                                                                                                                                                                                                                                                                             |

| Name | Country | Study design | Age | Sample size (cases/total) | Vaccination type | Time                         | Main outcome                                                                                                                                                                                                                                                                                                                                                                                                                                                                                                                                                                                                                                                                                                |
|------|---------|--------------|-----|---------------------------|------------------|------------------------------|-------------------------------------------------------------------------------------------------------------------------------------------------------------------------------------------------------------------------------------------------------------------------------------------------------------------------------------------------------------------------------------------------------------------------------------------------------------------------------------------------------------------------------------------------------------------------------------------------------------------------------------------------------------------------------------------------------------|
|      |         |              |     |                           |                  | 61-90 days<br>$\geq 91$ days | VE (0-30 days) = 49.6% (28.5%-64.5%)<br>VE (31-60 days) = 23.0% (-14.0%-48.1%)<br>VE (61-90 days) = 11.0% (-26.8%-37.5%)<br>VE ( $\geq 91$ days) = -9% (-30.0%-32.0%)<br>COVID-19 Omicron infection for 2-dose BNT162b2 mRNA in 15-17 years.<br>VE (no time limit) = 30.6% (26.9%-34.1%)<br>VE ( $\geq 14$ days) = 51.3% (34.9%-63.6%)<br>VE (14-59 days) = 41.1% (36.1%-45.3%)<br>VE (60-149 days) = 24.2% (17.5%-30.4%)<br>VE (150-300 days) = -1.7% (-16.9%-11.5%)<br>COVID-19 Omicron infection for 2-dose BNT162b2 mRNA in 12-14 years.<br>VE (no time limit) = 35.6% (31.2%-39.6%)<br>COVID-19 Omicron infection for 2-dose BNT162b2 mRNA in 15-17 years.<br>VE (no time limit) = 20.9% (13.8%-27.4%) |



| Name          | Country | Study design       | Age         | Sample size (cases/total) | Vaccination type                                                                                                                                                                                                                                                       | Time                                               | Main outcome                                                                                                                                                                                                                                                                                                                                                                                                                                                                                                                                                                                                      |
|---------------|---------|--------------------|-------------|---------------------------|------------------------------------------------------------------------------------------------------------------------------------------------------------------------------------------------------------------------------------------------------------------------|----------------------------------------------------|-------------------------------------------------------------------------------------------------------------------------------------------------------------------------------------------------------------------------------------------------------------------------------------------------------------------------------------------------------------------------------------------------------------------------------------------------------------------------------------------------------------------------------------------------------------------------------------------------------------------|
|               |         |                    |             |                           |                                                                                                                                                                                                                                                                        |                                                    | COVID-19 Omicron symptomatic infection for 2-dose BNT162b2 mRNA in 12-17 years.<br><br>VE (no time limit) = 43.6% (35.1%-50.9%)                                                                                                                                                                                                                                                                                                                                                                                                                                                                                   |
| Oliveira 2022 | Brail   | Case-control study | 12-19 years | 3705/8458                 | 1-dose BNT162b2/ChAdOx1 nCoV-19/CoronaVac<br><br>2-dose BNT162b2/ChAdOx1 nCoV-19/CoronaVac<br><br>1-dose BNT162b2 mRNA vaccine<br><br>2-dose BNT162b2 mRNA vaccine<br><br>1-dose ChAdOx1 nCoV-19 vaccine<br><br>2-dose ChAdOx1 nCoV-19 vaccine<br><br>1-dose CoronaVac | 14-30 days<br>31-60 days<br>61-90 days<br>>90 days | COVID-19 Omicron hospitalization for 1-dose BNT162b2/ChAdOx1 nCoV-19/CoronaVac in 12-19 years.<br><br>VE (no time limit) = 39.9% (25.0%-50.7%)<br><br>COVID-19 Omicron hospitalization for 1-dose BNT162b2/ChAdOx1 nCoV-19/CoronaVac in 12-15 years.<br><br>VE (no time limit) = 49.0% (29.0%-63.0%)<br><br>COVID-19 Omicron hospitalization for 1-dose BNT162b2/ChAdOx1 nCoV-19/CoronaVac in 16-17 years.<br><br>VE (no time limit) = 17.0% (-26.0%-45.0%)<br><br>COVID-19 Omicron hospitalization for 1-dose BNT162b2/ChAdOx1 nCoV-19/CoronaVac in 18-19 years.<br><br>VE (no time limit) = 39.0% (11.0%-59.0%) |

| Name | Country | Study design | Age | Sample size (cases/total) | Vaccination type                    | Time | Main outcome                                                                                                                                                                                                                                                                                                                                                                                                                                                                                                                                                                                                                                                                                                                                                             |
|------|---------|--------------|-----|---------------------------|-------------------------------------|------|--------------------------------------------------------------------------------------------------------------------------------------------------------------------------------------------------------------------------------------------------------------------------------------------------------------------------------------------------------------------------------------------------------------------------------------------------------------------------------------------------------------------------------------------------------------------------------------------------------------------------------------------------------------------------------------------------------------------------------------------------------------------------|
|      |         |              |     |                           | vaccine<br>2-dose CoronaVac vaccine |      | <p>COVID-19 Omicron hospitalization for 2-dose BNT162b2/ChAdOx1 nCoV-19/CoronaVac in 12-19 years.</p> <p>VE (no time limit) = 59.0% (49.0%-66.0%)</p> <p>VE (14-30 days) = 75% (55.0%-86.0%)</p> <p>VE (31-60 days) = 62.1% (46.9%-70.7%)</p> <p>VE (61-90 days) = 57.9% (42.9%-69.7%)</p> <p>VE (<math>\geq 90</math> days) = 54.0% (39.0%-68.0%)</p> <p>COVID-19 Omicron hospitalization for 2-dose BNT162b2/ChAdOx1 nCoV-19/CoronaVac in 12-15 years.</p> <p>VE (no time limit) = 63.0% (48.0%-74.0%)</p> <p>COVID-19 Omicron hospitalization for 2-dose BNT162b2/ChAdOx1 nCoV-19/CoronaVac in 16-17 years.</p> <p>VE (no time limit) = 46.0% (20.0%-54.0%)</p> <p>COVID-19 Omicron hospitalization for 2-dose BNT162b2/ChAdOx1 nCoV-19/CoronaVac in 18-19 years.</p> |

| Name | Country | Study design | Age | Sample size (cases/total) | Vaccination type | Time | Main outcome                                                                                                                                                                                                                                                                                                                                                                                                                                                                                                                                                                                                                                                                                                                                                                           |
|------|---------|--------------|-----|---------------------------|------------------|------|----------------------------------------------------------------------------------------------------------------------------------------------------------------------------------------------------------------------------------------------------------------------------------------------------------------------------------------------------------------------------------------------------------------------------------------------------------------------------------------------------------------------------------------------------------------------------------------------------------------------------------------------------------------------------------------------------------------------------------------------------------------------------------------|
|      |         |              |     |                           |                  |      | <p>VE (no time limit) = 60.0% (45.0%-72.0%)</p> <p>COVID-19 Omicron hospitalization for 1-dose BNT162b2 in 12-18 years.</p> <p>VE (no time limit) = 35.0% (16.0%-59.0%)</p> <p>COVID-19 Omicron hospitalization for 2-dose BNT162b2 in 12-18 years.</p> <p>VE (no time limit) = 60.0% (47.0%-69.0%)</p> <p>COVID-19 Omicron hospitalization for 1-dose BNT162b2 in 18-19 years.</p> <p>VE (no time limit) = 35.0% (-10.0%-58.0%)</p> <p>COVID-19 Omicron hospitalization for 2-dose BNT162b2 in 18-19 years.</p> <p>VE (no time limit) = 58.0% (35.0%-72.0%)</p> <p>COVID-19 Omicron hospitalization for 1-dose ChAdOx1 nCoV-19 in 18-19 years.</p> <p>VE (no time limit) = 55.0% (15.0%-72.0%)</p> <p>COVID-19 Omicron hospitalization for 2-dose ChAdOx1 nCoV-19 in 18-19 years.</p> |

| Name          | Country   | Study design | Age        | Sample size (cases/total) | Vaccination type                                    | Time          | Main outcome                                                                                                                                                                                                                                                                                                                                                                                                                                                                                                                                                                                                               |
|---------------|-----------|--------------|------------|---------------------------|-----------------------------------------------------|---------------|----------------------------------------------------------------------------------------------------------------------------------------------------------------------------------------------------------------------------------------------------------------------------------------------------------------------------------------------------------------------------------------------------------------------------------------------------------------------------------------------------------------------------------------------------------------------------------------------------------------------------|
|               |           |              |            |                           |                                                     |               | <p>VE (no time limit) = 53.0% (12.0%-75.0%)</p> <p>COVID-19 Omicron hospitalization for 1-dose CoronaVac in 18-19 years.</p> <p>VE (no time limit) = 26.0% (-25.0%-68.0%)</p> <p>COVID-19 Omicron hospitalization for 2-dose CoronaVac in 18-19 years.</p> <p>VE (no time limit) = 44.0% (11.0%-65.0%)</p> <p>COVID-19 Omicron severe infection for 1-dose BNT162b2/ChAdOx1 nCoV-19/CoronaVac in 12-19 years.</p> <p>VE (no time limit) = 23.0% (-17.0%-49.0%)</p> <p>COVID-19 Omicron severe infection for 2-dose BNT162b2/ChAdOx1 nCoV-19/CoronaVac in 12-19 years.</p> <p>VE (no time limit) = 25.0% (-18.0%-49.0%)</p> |
| González 2022 | Argentina | Cohort study | 3-17 years | 1536435/1536435           | 2-dose BBIBP-CorV vaccine<br><br>2-dose vaccination | No time limit | <p>COVID-19 Omicron hospitalization for 2-dose BBIBP-CorV in 3-11 years.</p> <p>VE (no time limit) =58.6% (4.1%-79.7%)</p> <p>COVID-19 Omicron severe infection for 2-</p>                                                                                                                                                                                                                                                                                                                                                                                                                                                 |

| Name      | Country | Study design       | Age        | Sample size (cases/total) | Vaccination type             | Time                                                | Main outcome                                                                                                                                                                                                                                                                                                                                                                                |
|-----------|---------|--------------------|------------|---------------------------|------------------------------|-----------------------------------------------------|---------------------------------------------------------------------------------------------------------------------------------------------------------------------------------------------------------------------------------------------------------------------------------------------------------------------------------------------------------------------------------------------|
|           |         |                    |            |                           |                              |                                                     | dose vaccination in 12-17 years.<br>VE (no time limit) =78.2% (42.0%-90.3%)                                                                                                                                                                                                                                                                                                                 |
| Jara 2022 | Chile   | Cohort study       | 3-5 years  | 194427/490694             | 2-dose CoronaVac vaccine     | No time limit                                       | COVID-19 Omicron hospitalization for 2-dose CoronaVac vaccine in 3-5 years.<br>VE (no time limit) =38.2% (36.5%-39.9%)<br><br>COVID-19 Omicron symptomatic infection for 2-dose CoronaVac vaccine in 3-5 years.<br>VE (no time limit) = 64.6% (49.6%-75.2%)<br><br>COVID-19 Omicron severe infection for 2-dose CoronaVac vaccine in 3-5 years.<br>VE (no time limit) = 69.0% (18.6%-88.2%) |
| Jang 2023 | Korea   | Case-control study | 5-11 years | 29473/3046386             | 2-dose BNT162b2 mRNA vaccine | 15-30 days<br>31-60 days<br>61-90 days<br>1-90 days | COVID-19 Omicron symptomatic infection for 2-dose BNT162b2 mRNA in 5-11 years.<br>VE (15-30 days) = 57.6% (51.6%-62.8%)<br>VE (31-60 days) = 46.9% (43.7%-49.9%)<br>VE (61-90 days) = 41.2% (34.3%-47.4%)<br><br>COVID-19 Omicron severe infection for 2-                                                                                                                                   |

| Name | Country | Study design | Age | Sample size (cases/total) | Vaccination type | Time | Main outcome                                                          |
|------|---------|--------------|-----|---------------------------|------------------|------|-----------------------------------------------------------------------|
|      |         |              |     |                           |                  |      | dose BNT162b2 mRNA in 5-11 years.<br>VE (1-90 days) =100% (100%-100%) |

VE: Vaccine effectiveness; COVID-19: coronavirus disease 2019.

**Supplemental Table 2. Quality of evidence in included studies.**

| Study              | Newcastle-Ottawa scale score |               |                   | Total score | Study quality |
|--------------------|------------------------------|---------------|-------------------|-------------|---------------|
|                    | Selection                    | Comparability | Outcome /Exposure |             |               |
| Amir 2022          | 3                            | 2             | 2                 | 7           | High          |
| Buchan 2022        | 3                            | 1             | 2                 | 6           | Moderate      |
| Castelli 2022      | 4                            | 1             | 2                 | 7           | High          |
| Chemaitelly 2022   | 4                            | 2             | 2                 | 8           | High          |
| Chiew 2022         | 4                            | 1             | 2                 | 7           | High          |
| Cocchio 2022       | 4                            | 1             | 1                 | 6           | Moderate      |
| Cohen-Stavi 2022   | 4                            | 1             | 1                 | 6           | Moderate      |
| Dorabawila 2022    | 4                            | 1             | 1                 | 6           | Moderate      |
| Fleming-Dutra 2022 | 3                            | 1             | 2                 | 6           | Moderate      |
| Florentino 2022    | 4                            | 1             | 2                 | 7           | High          |
| Florentino' 2022   | 4                            | 1             | 2                 | 7           | High          |
| Florentino" 2022   | 4                            | 1             | 2                 | 7           | High          |
| Fowlkes 2022       | 4                            | 0             | 2                 | 6           | Moderate      |
| González 2022      | 4                            | 1             | 2                 | 7           | High          |
| Jang 2023          | 4                            | 1             | 2                 | 7           | High          |
| Jara 2022          | 4                            | 2             | 1                 | 7           | High          |
| Klein 2022         | 4                            | 0             | 1                 | 5           | Moderate      |
| Leung 2023         | 4                            | 0             | 1                 | 5           | Moderate      |
| Nordström 2022     | 4                            | 2             | 1                 | 7           | High          |
| Oliveira 2022      | 4                            | 2             | 2                 | 8           | High          |
| Powell 2022        | 4                            | 0             | 1                 | 5           | Moderate      |
| Price 2022         | 3                            | 1             | 1                 | 5           | Moderate      |
| Risk 2022          | 4                            | 1             | 2                 | 7           | High          |
| Rosa 2022          | 4                            | 0             | 1                 | 5           | Moderate      |
| Rudan 2022         | 4                            | 1             | 2                 | 7           | High          |
| Sacco 2022         | 4                            | 0             | 1                 | 5           | Moderate      |
| Saito 2022         | 4                            | 0             | 1                 | 5           | Moderate      |
| Simmons 2022       | 4                            | 2             | 1                 | 7           | High          |
| Tan 2022           | 4                            | 1             | 1                 | 6           | Moderate      |
| Tartof 2022        | 4                            | 1             | 2                 | 7           | High          |
| Tsang 2022         | 4                            | 2             | 2                 | 8           | High          |
| Wang 2022          | 3                            | 1             | 1                 | 5           | Moderate      |
| Wanlapakorn 2022   | 3                            | 1             | 1                 | 5           | Moderate      |
